# Supplementary material
Source: publisher figshare collection journal article supplement (https://acs.figshare.com/ndownloader/files/4715305)
Supplement: Supplementary file 1 [file 4715305]

## Supporting Information

### Factor Xa Inhibitors: S1 Binding Interactions of a Series of *N*-{(3*S*)-1-[(1*S*)-1-Methyl-2-morpholin-4-yl-2-oxoethyl]-2-oxopyrrolidin-3-yl}sulfonamides<sup>\*</sup>

Chuen Chan<sup>\*\*, a</sup>, Alan D. Borthwick<sup>a</sup>, David Brown<sup>b</sup>, Matthew Campbell<sup>a</sup>, Laiq Chaudry<sup>c</sup>, Chun-wa Chung<sup>d</sup>, Máire A. Convery<sup>d</sup>, J. Nicole Hamblin<sup>a</sup>, Lisa Johnstone<sup>a</sup>, Henry A. Kelly<sup>a</sup>, Savvas Kleanthous<sup>a</sup>, Cynthia L. Kurtis<sup>f</sup>, Angela Patikis<sup>e</sup>, Champa Patel<sup>c</sup>, Anthony J. Pateman<sup>e</sup>, Stefan Senger<sup>d</sup>, Gita P. Shah<sup>a</sup>, John R. Toomey<sup>f</sup>, Nigel S. Watson<sup>a</sup>, Helen E. Weston<sup>a</sup>, Caroline Whitworth<sup>a</sup>, Robert J. Young<sup>a</sup>, Ping Zhou<sup>e</sup>

<sup>a</sup>CVU UK Medicinal Chemistry Department, <sup>b</sup>Screening and Compound Profiling UK, <sup>c</sup>Assay Development UK, <sup>d</sup>Computational and Structural Sciences, <sup>e</sup>CVU UK DMPK Department, GlaxoSmithKline Research and Development, Medicines Research Centre, Gunnels Wood Road, Stevenage, Hertfordshire SG1 2NY, United Kingdom. <sup>f</sup>Vascular Inflammatory Diseases, GlaxoSmithKline, 709 Swedeland Road, King of Prussia, PA, 19406, USA.

<sup>\*</sup>PDB ID codes for **1a**, **1b**, **1d**, **1e** and **1x** complexed with factor Xa are 2cji, 2j95, 2j38, 2j34 and 2j94 respectively.

<sup>\*\*</sup> Tel: (+44) 1438 768445

Fax: (+44) 1438 764869

e-mail address: [chuen.8.chan@gsk.com](mailto:chuen.8.chan@gsk.com)

## Table of Contents

|                                                                                      |    |
|--------------------------------------------------------------------------------------|----|
| 1. Analytical Data for Sulfonamides 1                                                | S2 |
| 2. Other Experimental Data                                                           | S4 |
| 3. Electrostatic Potential Maps of selected chloro-(hetero)aryl N-methylsulfonamides | S8 |

## Analytical Data for Sulfonamides 1

**1a:** For  $C_{21}H_{24}ClN_3O_5S$ .  $0.55HCO_2H$ , Calcd: C 52.69%, H 5.15%, N 8.55%; found: C 52.63%, H 5.19%, N 8.32%.

**1b:** For  $C_{19}H_{22}ClN_3O_5S_3$ .  $0.5H_2O$ , Calcd: C 44.48%, H 4.52%, N 8.19%; found: C 44.77%, H 4.41%, N 7.89%.

**1c:** For  $C_{19}H_{24}ClN_3O_5S$ .  $0.6H_2O$ , Calcd: C 50.41%, H 5.61%, N 9.28%; found: C 50.50%, H 5.47%, N 8.95%.

**1d:** For  $C_{19}H_{22}ClN_3O_5S_2$ .  $0.6H_2O$ , Calcd: C 47.27%, H 4.84%, N 8.70%; C 47.29%, H 4.68%, N 8.36%.

**1e:** For  $C_{19}H_{22}ClN_3O_5S_2$ .  $0.5H_2O$ , Calcd: C 47.45%, H 4.82%, N 8.74%; found: C 47.59%, H 4.78%, N 8.60%.

**1f:** For  $C_{17}H_{22}ClN_3O_5S_2$ , Calcd: C 45.58%, H 4.95%, N 9.38%; found: C 45.33%, H 4.90%, N 9.20%.

**1g:** For  $C_{22}H_{27}N_3O_5S$ .  $0.9H_2O$ , Calcd: C 57.23%, H 6.29%, N 9.10%; found: C 57.12%, H 6.06%, N 8.76%.

**1h:** For  $C_{17}H_{20}ClN_3O_5S_3$ .  $1.0H_2O$ , Calcd: C 41.17%, H 4.47%, N 8.47%; found: C 41.29%, H 4.26%, N 8.39%.

**1i:** HRMS for  $C_{19}H_{23}N_3O_5ClS$ ,  $m/z$  ( $MH^+$ ) calc. 442.1203; measured 442.1213. LC-MS:  $t_R$  2.70mins, 98% purity;  $m/z$  (ES) 442/444  $MH^+$ , 440/442 ( $M-H$ ) $^-$ .

**1j:** For  $C_{18}H_{21}ClN_4O_5S_2$ .  $0.8H_2O$ , Calcd: C 44.36%, H 4.67%, N 11.50%; found: C 44.50%, H 4.51%, N 11.15%.

**1k:** For  $C_{18}H_{21}ClN_4O_5S_2$ .  $0.5Dioxan$ , Calcd: C 46.46%, H 4.87%, N 10.84%; found: C 46.69%, H 5.04%, N 10.62%.

**1l:** For  $C_{18}H_{21}ClN_4O_5S_2$ .  $0.3H_2O$ , Calcd: C 45.19%, H 4.55%, N 11.71%; found: C 45.39%, H 4.41%, N 11.42%.

**1m:** For  $C_{17}H_{20}ClN_5O_5S_3$ .  $0.53HCO_2H$ , Calcd: C 39.70%, H 4.00%, N 13.20%; found: C 40.09%, H 4.04%, N 12.83%.

**1n:** HRMS: For  $C_{18}H_{21}ClN_4O_5S_3$ ,  $m/z$  ( $MH^+$ ) calc. 505.0441; measured: 505.0431. LC-MS:  $t_R$  2.83mins, 95% purity;  $m/z$  (ES) 505/507  $MH^+$ , 503/505 ( $M-H$ ) $^-$ .

**1o:** For  $C_{19}H_{22}ClN_3O_6S$ .  $0.5H_2O$ , Calcd: C 49.09%, H 4.99%, N 9.04%; found: C 49.22%, H 4.94%, N 8.85%.

**1p:** For  $C_{19}H_{22}ClN_3O_6S$ .  $0.8H_2O$ , Calcd: C 48.52%, H 5.06%, N 8.93%; found: C 48.72%, H 4.74%, N 8.62%.

**1q:** HRMS: For  $C_{18}H_{21}ClN_4O_5S_2$ ,  $m/z$  ( $MH^+$ ) calcd. 473.0720; measured: 473.0719. LC-MS:  $t_R$  2.98mins, 98% purity;  $m/z$  (ES) 473 $MH^+$ .

**1r:** For  $C_{18}H_{21}ClN_4O_5S_2 \cdot 0.6HCO_2H$ , Calcd: C 44.63%, H 4.47%, N 11.19%; found: C 44.56%, H 4.43%, N 10.93%.

**1s:** HRMS: For  $C_{19}H_{23}ClN_4O_5S$ ,  $m/z$  ( $MH^+$ ) calcd. 455.1156; measured: 455.1158. LC-MS:  $t_R$  2.95mins, 96% purity;  $m/z$  (ES) 455/457  $MH^+$ , 453/455 ( $M-H$ ) $^-$ .

**1t:** HRMS: For  $C_{19}H_{24}^{35}ClN_4O_5S$ ,  $m/z$  ( $MH^+$ ) calc. 455.1156; measured: 455.1160. LC-MS:  $t_R$  2.84mins, 98% purity;  $m/z$  (ES) 455/457  $MH^+$ , 453/455 ( $M-H$ ) $^-$ .

**1u:** For  $C_{19}H_{22}ClN_3O_6S_2 \cdot 0.55HCO_2H$ , Calcd: C 45.75%, H 4.54%, N 8.19%; found: C 45.66%, H 4.44%, N 7.87%.

**1v:** For  $C_{18}H_{21}ClN_4O_5S_3 \cdot 0.6H_2O$ , Calcd: C 41.91%, H 4.34%, N 10.86%; found: C 41.99%, H 4.25%, N 10.61%.

**1w:** For  $C_{18}H_{21}ClN_4O_5S_3 \cdot 0.5H_2O$ , Calcd: C 42.06%, H 4.31%, N 10.90%; found: C 42.35%, H 4.27%, N 10.34%.

**1x:** For  $C_{17}H_{21}ClN_6O_5S_2 \cdot 1.2H_2O$ , Calcd: C 39.99%, H 4.62%, N 16.46%; found: C 40.09%, H 4.38%, N 16.24%.

**1y:** For  $C_{20}H_{23}ClN_4O_5S_2 \cdot 0.5H_2O$ , Calcd: C 47.29%, H 4.76%, N 11.03%; found: C 47.32%, H 4.65%, N 10.85%.

## Other Spectroscopic and Analytical Data

### **6-Chloro-*N*-{(3*S*)-1-[(1*S*)-1-methyl-2-morpholin-4-yl-2-oxoethyl]-2-oxopyrrolidin-3-yl}naphthalene-2-sulfonamide 1a**

**1a** (124mg, 62%) was synthesized from **2** (104mg, 0.43mmol) and 6-chloro-2-naphthalenesulfonyl chloride<sup>13(a)</sup> (1.1 eq., 124mg, 0.475mmol) using **Method A** under General Procedures. <sup>1</sup>H-NMR:  $\delta$ (CDCl<sub>3</sub>) 1.27 (d, 3H, *J* = 7Hz), 1.70 -2.10 (m, 1H), 2.56-2.65 (m, 1H), 3.24-3.33 (m, 1H), 3.41-3.78 (m, 9H), 3.75 (ddd, 1H, *J* = 11, 8 and 3Hz), 4.99 (q, 1H, *J* = 7Hz), 5.36 (bd, 1H, *J* = 3 Hz), 7.57 (dd, 1H, *J* = 9 and 2Hz), 7.89-7.95 (m, 4H), 8.45 (s, 1H). LC-MS: *t*<sub>R</sub> 2.98mins; *m/z* (ES) 466/468 MH<sup>+</sup>, 464/466 (M-H)<sup>-</sup>. Anal. (C<sub>21</sub>H<sub>24</sub>ClN<sub>3</sub>O<sub>5</sub>S. 0.55CH<sub>2</sub>O<sub>2</sub>): C, H, N.

### **5'-Chloro-*N*-{(3*S*)-1-[(1*S*)-1-methyl-2-morpholin-4-yl-2-oxoethyl]-2-oxopyrrolidin-3-yl}-2,2'-bithiophene-5-sulfonamide 1b**

**1b** (299mg, 54%) as a light brown solid was synthesized from **2** (267mg, 1.11mmol) and 5'-chloro-2,2'-bithiophene-5-sulfonyl chloride<sup>14</sup> (1.05eq., 349mg, 1.17mmol) using **Method A** under General Procedures. <sup>1</sup>H-NMR:  $\delta$ (CDCl<sub>3</sub>) 1.33 (d, 3H, *J* = 7Hz), 2.03 -2.15 (m, 1H), 2.60-2.68 (m, 1H), 3.31-3.39 (m, 1H), 3.44-3.73 (m, 9H), 3.89 (ddd, 1H, *J* = 10.5, 8 and 2.5Hz), 5.04 (q, 1H, *J* = 7Hz), 5.65 (bd, 1H, *J* = 3 Hz), 6.89 (dd, 1H, *J* = 4Hz), 7.04-7.05 (m, 2H), 7.55 (d, 1H, *J* = 4Hz). LC-MS: *t*<sub>R</sub> 3.16mins; *m/z* (ES) 504/506 MH<sup>+</sup>, 502/504 (M-H)<sup>-</sup>. Anal. (C<sub>19</sub>H<sub>22</sub>ClN<sub>3</sub>O<sub>5</sub>S<sub>3</sub>. 0.5H<sub>2</sub>O): C, H, N.

### **(*E*)-2-(4-Chlorophenyl)-*N*-{(3*S*)-1-[(1*S*)-1-methyl-2-morpholin-4-yl-2-oxoethyl]-2-oxopyrrolidin-3-yl}ethenesulfonamide 1c**

**1c** (950mg, 52%) as a white powder was synthesized from **2** (1g, 4.14mmol) and (*E*)-2-(4-chlorophenyl)ethenesulfonyl chloride<sup>13(b)</sup> (1.2 eq., 1.178g, 4.97mmol) using **Method A** under General Procedures. <sup>1</sup>H-NMR:  $\delta$ (CDCl<sub>3</sub>) 1.34 (d, 3H, *J* = 7Hz), 1.99 -2.13 (m, 1H), 2.59-2.68 (m, 1H), 3.30-3.39 (m, 1H), 3.44-3.73 (m, 9H), 3.89 (bt, 1H, *J* = 10Hz), 5.05 (q, 1H, *J* = 7Hz), 5.12 (bs, 1H), 6.87 (d, 1H, *J* = 15.5Hz), 7.39 (d, 1H, *J* = 8.5Hz), 7.44 (d, 1H, *J* = 8.5Hz), 7.47 (d, 1H, *J* = 15.5Hz). LC-MS: *t*<sub>R</sub> 2.87mins; *m/z* (ES) 442/444 MH<sup>+</sup>, 440/442 (M-H)<sup>-</sup>. Anal. (C<sub>19</sub>H<sub>24</sub>ClN<sub>3</sub>O<sub>5</sub>S. 0.6H<sub>2</sub>O): C, H, N.

### **5-Chloro-*N*-{(3*S*)-1-[(1*S*)-1-methyl-2-morpholin-4-yl-2-oxoethyl]-2-oxopyrrolidin-3-yl}-1-benzothiophene-2-sulfonamide 1d**

**1d** (1.8g, 65%) was synthesized from **2** (2.08g, 8.62mmol) and 5-chloro-1-benzothiophene-2-sulfonyl chloride<sup>14</sup> (1.2 eq., 2.75g, 10.3mmol) using **Method A** under General Procedures. <sup>1</sup>H-NMR:  $\delta$ (CDCl<sub>3</sub>) 1.31 (d, 3H, *J* = 7Hz), 2.04 -2.16 (m, 1H), 2.63-2.72 (m, 1H), 3.30-3.39 (m, 1H), 3.44-3.73 (m, 9H), 3.86-3.94 (m, 1H), 5.01 (q, 1H, *J* = 7Hz), 5.49 (bs, 1H), 7.47 (dd, 1H, *J* = 9 and 2Hz), 7.79 (d, 1H, *J* = 8.5Hz), 7.85-7.90 (m, 2H). LC-MS: *t*<sub>R</sub> 2.87mins; *m/z* (ES) 472/474 MH<sup>+</sup>, 470/472 (M-H)<sup>-</sup>. Anal. (C<sub>19</sub>H<sub>22</sub>ClN<sub>3</sub>O<sub>5</sub>S<sub>2</sub>. 0.6H<sub>2</sub>O): C, H, N.

### **6-Chloro-*N*-{(3*S*)-1-[(1*S*)-1-methyl-2-morpholin-4-yl-2-oxoethyl]-2-oxopyrrolidin-3-yl}-1-benzothiophene-2-sulfonamide 1e**

**1e** (1g, 51%) as a white powder was synthesized from **2** (1g, 4.41 mmol) and 6-chloro-1-benzothiophene-2-sulfonyl chloride<sup>14</sup> (1.2 eq., 1.328g, 4.97mmol) using **Method A** under General Procedures. <sup>1</sup>H-NMR:  $\delta$ (CDCl<sub>3</sub>) 1.31 (d, 3H, *J* = 7Hz), 2.03 -2.16 (m, 1H), 2.64-2.72 (m, 1H), 3.31-3.39 (m, 1H), 3.44-3.74 (m, 9H), 3.90 (ddd, 1H, *J* = 10.5, 8 and 2.5Hz), 5.02 (q, 1H, *J* = 7Hz), 5.49 (bd, 1H, *J* = 2.5Hz), 7.45

(dd, 1H, J = 8.5 and 2Hz), 7.82 (d, 1H, J = 8.5Hz), 7.86 (bs, 1H), 7.90 (s, 1H). LC-MS:  $t_R$  2.87mins;  $m/z$  (ES) 472/474  $MH^+$ , 470/472 (M-H) $^-$ . Anal. ( $C_{19}H_{22}ClN_3O_5S_2 \cdot 0.5H_2O$ ): C, H, N.

**6-Methyl-N-((3S)-1-[(1S)-1-methyl-2-(4-morpholinyl)-2-oxoethyl]-2-oxo-3-pyrrolidinyl)-2-naphthalenesulfonamide 1g**

**1g** (62mg, 84%) as a white foam was synthesized from **2** (39.9mg, 0.165mmol) and 6-methyl-2-naphthalenesulfonyl chloride<sup>13(d)</sup> (42mg, 0.17mmol) using **Method A** under General Procedures.  $^1H$ -NMR:  $\delta(CDCl_3)$  1.27 (d, 3H, J = 7Hz), 1.97-2.10 (m, 1H), 2.56-2.64 (m, 1H), 2.57 (s, 3H), 3.24-3.33 (m, 1H), 3.42-3.76 (m, 10H), 5.00 (q, 1H, J = 7Hz), 5.30-5.53 (bs, 1H), 7.46 (d, 1H, J = 8.5Hz), 7.69 (s, 1H), 7.81-7.92 (m, 3H), 8.42 (s, 1H). LC-MS:  $t_R$  2.79mins;  $m/z$  (ES) 446  $MH^+$ , 444 (M-H) $^-$ . Anal. ( $C_{22}H_{27}N_3O_5S \cdot 0.9H_2O$ ): C, H, N.

**5-Chloro-N-((3S)-1-[(1S)-1-methyl-2-(4-morpholinyl)-2-oxoethyl]-2-oxo-3-pyrrolidinyl)thieno[3,2-b]thiophene-2-sulfonamide 1h**

Using **Method A** under General Procedures, **1h** (39.5mg, 20%) was synthesized from **2** (100mg, 0.41mmol) and crude 5-chlorothieno[3,2-b]thiophene-2-sulfonyl chloride (226mg, assumed 0.83mmol), prepared from 2-chlorothieno[3,2-b]thiophene [Bugge, A. Electrophilic substitution of thieno[2,3-b]thiophene and thieno[3,2-b]thiophene. Quantitative study. *Chem. Scr.* **1972**, 2(3), 137-42.] (150mg, 0.86mmol) using **Method B** under General Procedures.  $^1H$ -NMR:  $\delta(d^4\text{-MeOH})$  1.44 (d, 3H, J = 7Hz), 1.92-2.05 (m, 1H), 2.46-2.67 (m, 1H), 3.48-3.55 (m, 2H), 3.63-3.86 (m, 8H), 4.37 (dd, 1H, J = 10 and 8.5Hz), 5.18 (q, 1H, J = 7Hz), 7.58 (s, 1H), 8.07 (s, 1H). LC-MS:  $t_R$  2.85mins;  $m/z$  (ES) 478/480  $MH^+$ , 476/478 (M-H) $^-$ . Anal. ( $C_{17}H_{20}ClN_3O_5S_3 \cdot 1.0H_2O$ ): C, H, N.

**5-Chloro-N-((3S)-1-[(1S)-1-methyl-2-morpholin-4-yl-2-oxoethyl]-2-oxopyrrolidin-3-yl)thieno[3,2-b]pyridine-2-sulfonamide 1j**

**1j** was synthesized from **2** and 5-chlorothieno[3,2-b]pyridine-2-sulfonyl chloride<sup>14</sup> using **Method A** under General Procedures.  $^1H$ -NMR:  $\delta(d^4\text{-MeOH})$  1.25 (d, 3H, J = 7Hz), 1.78-1.91 (m, 1H), 2.36-2.45 (m, 1H), 3.31-3.37 (m, 2H), 3.43-3.68 (m, 8H), 4.31 (dd, 1H, J = 10.5 and 8.5Hz), 4.97 (q, 1H, J = 7Hz), 7.52 (d, 1H, J = 8.6Hz), 8.00 (s, 1H), 8.44 (d, 1H, J = 8.6Hz). LC-MS:  $t_R$  2.56mins;  $m/z$  (ES) 473/475  $MH^+$ , 471/473 (M-H) $^-$ . Anal. ( $C_{18}H_{21}ClN_4O_5S_2 \cdot 0.8H_2O$ ): C, H, N.

**5-Chloro-N-((3S)-1-[(1S)-1-methyl-2-morpholin-4-yl-2-oxoethyl]-2-oxopyrrolidin-3-yl)thieno[2,3-b]pyridine-2-sulfonamide 1k**

**1k** (66mg, 45%) was synthesized from **2** (75mg, 0.311mmol) and 5-chlorothieno[2,3-b]pyridine-2-sulfonyl chloride<sup>15(a)</sup> (100mg, 0.737mmol) using **Method A** under General Procedures.  $^1H$ -NMR:  $\delta(CDCl_3)$  1.32 (d, 3H, J = 7Hz), 2.03-2.17 (m, 1H), 2.63-2.73 (m, 1H), 3.31-3.39 (m, 1H), 3.44-3.75 (m, 9H), 3.93-4.00 (m, 1H), 5.01 (q, 1H, J = 7Hz), 5.57 (d, 1H, J = 3.3Hz), 7.82 (s, 1H), 8.16 (d, 1H, J = 2.3Hz), 8.65 (d, 1H, J = 2.3Hz). LC-MS:  $t_R$  2.64mins;  $m/z$  (ES) 473/475  $MH^+$ , 471/473 (M-H) $^-$ . Anal. ( $C_{18}H_{21}ClN_4O_5S_2 \cdot 0.5C_4H_8O_2$ ): C, H, N.

**6-Chloro-N-((3S)-1-[(1S)-1-methyl-2-(4-morpholinyl)-2-oxoethyl]-2-oxo-3-pyrrolidinyl)thieno[3,2-b]pyridine-2-sulfonamide 1l**

**1l** (80mg, 37%) was synthesized from **2** (110mg, 0.46mmol) and 6-chlorothieno[3,2-b]pyridine-2-sulfonyl chloride<sup>15(b)</sup> (crude, 177mg) using **Method A** under General

Procedures.  $^1\text{H-NMR}$ :  $\delta(\text{CDCl}_3)$  1.32 (d, 3H,  $J = 7\text{Hz}$ ), 2.04 -2.16 (m, 1H), 2.62-2.72 (m, 1H), 3.30-3.40 (m, 1H), 3.44-3.72 (m, 9H), 3.97 (ddd, 1H,  $J = 10.5$ , 8 and 3Hz), 5.02 (q, 1H,  $J = 7\text{Hz}$ ), 5.98 (d, 1H,  $J = 3\text{Hz}$ ), 8.09 (s, 1H), 8.20 (d, 1H,  $J = 2.3\text{Hz}$ ), 8.73 (d, 1H,  $J = 2.3\text{Hz}$ ). LC-MS:  $t_{\text{R}}$  2.59mins;  $m/z$  (ES) 473/475  $\text{MH}^+$ , 471/473  $(\text{M-H})^-$ . Anal. ( $\text{C}_{18}\text{H}_{21}\text{ClN}_4\text{O}_5\text{S}_2 \cdot 0.3\text{H}_2\text{O}$ ): C, H, N.

**5-(5-Chloro-1,3,4-thiadiazol-2-yl)-*N*-{(3*S*)-1-[(1*S*)-1-methyl-2-morpholin-4-yl-2-oxoethyl]-2-oxopyrrolidin-3-yl}thiophene-2-sulfonamide 1m**

**1m** (9mg, 20%) was synthesized from **2** (22.5mg, 0.09mmol) and 5-(5-chloro-1,3,4-thiadiazol-2-yl)-2-thiophenesulfonyl chloride (78mg, 0.26mmol) using **Method A** under General Procedures.  $^1\text{H-NMR}$ :  $\delta(\text{CDCl}_3)$  1.32 (d, 3H,  $J = 7\text{Hz}$ ), 2.02 -2.18 (m, 1H), 2.62-2.71 (m, 1H), 3.30-3.40 (m, 1H), 3.45-3.73 (m, 9H), 3.93 (dd, 1H,  $J = 10.5$  and 8 Hz), 5.03 (q, 1H,  $J = 7\text{Hz}$ ), 5.62 (bs, 1H), 7.66 (d, 1H,  $J = 4\text{Hz}$ ), 7.81 (d, 1H,  $J = 4\text{Hz}$ ). LC-MS:  $t_{\text{R}}$  2.82mins;  $m/z$  (ES) 506/508  $\text{MH}^+$ , 504/506  $(\text{M-H})^-$ . Anal. ( $\text{C}_{17}\text{H}_{20}\text{ClN}_5\text{O}_5\text{S}_3 \cdot 0.53\text{CH}_2\text{O}_2$ ): C, H, N.

**6-Chloro-*N*-{(3*S*)-1-[(1*S*)-1-methyl-2-(4-morpholinyl)-2-oxoethyl]-2-oxo-3-pyrrolidinyl}-1-benzofuran-2-sulfonamide 1o**

**1o** (78mg, 44%) as a white solid was synthesized from **2** (93mg, 0.385mmol) and 6-chloro-1-benzofuran-2-sulfonyl chloride<sup>16</sup> (crude, 116mg) using **Method A** under General Procedures.  $^1\text{H-NMR}$ :  $\delta(\text{CDCl}_3)$  1.32 (d, 3H,  $J = 7\text{Hz}$ ), 2.01 -2.14 (m, 1H), 2.62-2.72 (m, 1H), 3.35 (td, 1H,  $J = 10$  and 6Hz), 3.43-3.74 (m, 9H), 3.98-4.06 (m, 1H), 5.01 (q, 1H,  $J = 7\text{Hz}$ ), 5.74 (bd, 1H,  $J = 3.5\text{Hz}$ ), 7.34 (dd, 1H,  $J = 8.5$  and 2Hz), 7.42 (d, 1H,  $J = 1\text{Hz}$ ), 7.59 (overlapped with part of doublet at 7.60, 1H), 7.60 (d, 1H,  $J = 8.5\text{Hz}$ ). LC-MS:  $t_{\text{R}}$  2.87mins;  $m/z$  (ES) 456/458  $\text{MH}^+$ , 454/456  $(\text{M-H})^-$ . Anal. ( $\text{C}_{19}\text{H}_{22}\text{ClN}_3\text{O}_6\text{S} \cdot 0.5\text{H}_2\text{O}$ ), C, H, N.

**5-Chloro-*N*-{(3*S*)-1-[(1*S*)-1-methyl-2-(4-morpholinyl)-2-oxoethyl]-2-oxo-3-pyrrolidinyl}-1-benzofuran-2-sulfonamide 1p**

**1p** (0.043g) as a white solid was synthesized from **2** (0.077g) and 5-chloro-1-benzofuran-2-sulfonyl chloride<sup>16</sup> (0.043g) using **Method A** under General Procedures.  $^1\text{H-NMR}$ :  $\delta(\text{d}^4\text{-MeOH})$  1.25 (d, 3H,  $J = 7\text{Hz}$ ), 1.78-1.91 (m, 1H), 2.34-2.43 (m, 1H), 3.31-3.38 (m, 2H), 3.42-3.68 (m, 8H), 4.28 (dd, 1H,  $J = 10.6$  and 8.6Hz), 4.97 (q, 1H,  $J = 7\text{Hz}$ ), 7.44-7.50 (m, 2H), 7.59 (d, 1H,  $J = 9\text{Hz}$ ), 7.76 (d, 1H,  $J = 2\text{Hz}$ ). LC-MS:  $t_{\text{R}}$  2.73mins;  $m/z$  (ES) 456/458  $\text{MH}^+$ , 454/456  $(\text{M-H})^-$ . Anal. ( $\text{C}_{19}\text{H}_{22}\text{ClN}_3\text{O}_6\text{S} \cdot 0.8\text{H}_2\text{O}$ ): C, H, N.

**5-Chloro-*N*-{(3*S*)-1-[(1*S*)-1-methyl-2-morpholin-4-yl-2-oxoethyl]-2-oxopyrrolidin-3-yl}-1,3-benzothiazole-2-sulfonamide 1r**

(3*S*)-3-[[5-Chloro-1,3-benzothiazol-2-yl]thio]amino}-1-[(1*S*)-1-methyl-2-morpholin-4-yl-2-oxoethyl]pyrrolidin-2-one (1.56g, 71%) was prepared from **2** (1.19g, 4.95mmol) and 5-chloro-1,3-benzothiazole-2(3*H*)-thione<sup>22</sup> (1g, 4.96mmol) in a similar manner to (3*S*)-3-[[6-chloro-1,3-benzothiazol-2-yl]thio]amino}-1-[(1*S*)-1-methyl-2-morpholin-4-yl-2-oxoethyl]pyrrolidin-2-one (the 6-chloro-analogue).  $^1\text{H-NMR}$ :  $\delta(\text{CDCl}_3)$  1.35 (d, 3H,  $J = 6.8\text{Hz}$ ), 2.07 -2.19 (m, 1H), 2.41-2.51 (m, 1H), 3.31-3.46 (m, 2H), 3.49-3.78 (m, 8H), 4.04 (ddd, 1H,  $J = 11.6$ , 8.3 and 3.5Hz), 4.81 (d, 1H,  $J = 3.5\text{Hz}$ ), 5.11 (q, 1H,  $J = 6.8\text{Hz}$ ), 7.28 (dd, 1H,  $J = 8$  and 2Hz), 7.70 (d, 1H,  $J = 8\text{Hz}$ ), 7.81 (d, 1H,  $J = 1.8\text{Hz}$ ). LC-MS:  $t_{\text{R}}$  2.88mins;  $m/z$  (ES) 441/443  $\text{MH}^+$ , 439/441  $(\text{M-H})^-$ .

**1r** (84mg, 5%) was synthesized from 3(*S*)-3-{[(5-chloro-1,3-benzothiazol-2-yl)thio]amino}-1-[(1*S*)-1-methyl-2-morpholin-4-yl-2-oxoethyl]pyrrolidin-2-one (1.5g, 3.4mmol) using procedure as described for **1q**. <sup>1</sup>H-NMR: δ(*d*<sup>4</sup>-MeOH) 1.25 (d, 3H, *J* = 7Hz), 1.84-1.96 (m, 1H), 2.40-2.50 (m, 1H), 3.32-3.39 (m, 2H), 3.40-3.68 (m, 8H), 4.43 (dd, 1H, *J* = 10.4 and 8.6Hz), 4.95 (q, 1H, *J* = 7Hz), 7.60 (dd, 1H, *J* = 8.6 and 2Hz), 8.11 (d, 1H, *J* = 8.6Hz), 8.15 (d, 1H, *J* = 2Hz). LC-MS: *t*<sub>R</sub> 2.76mins; *m/z* (ES) 473/475 MH<sup>+</sup>, 471/473 (M-H)<sup>-</sup>. Anal. (C<sub>18</sub>H<sub>21</sub>ClN<sub>4</sub>O<sub>5</sub>S<sub>2</sub>·0.6CH<sub>2</sub>O<sub>2</sub>): C, H, N.

**6-Chloro-*N*-{[(3*S*)-1-[(1*S*)-1-methyl-2-morpholin-4-yl-2-oxoethyl]-2-oxopyrrolidin-3-yl]-1*H*-indole-2-sulfonamide 1t**

*t*-Butyl 6-chloro-2-[(3(*S*)-1-[(1*S*)-1-methyl-2-morpholin-4-yl-2-oxoethyl]-2-oxopyrrolidin-3-yl)amino)sulfonyl]-1*H*-indole-1-carboxylate (28.5mg, 12.5%) was synthesized from **2** (100mg, 0.41mmol) and 1,1-dimethylethyl 6-chloro-2-(chlorosulfonyl)-1*H*-indole-1-carboxylate<sup>17</sup> (174mg, 0.50mmol) using **Method A** under General Procedures. <sup>1</sup>H-NMR: δ(*d*<sup>4</sup>-MeOH) 1.25 (d, 3H, *J* = 7Hz), 1.74 (s, 9H), 1.97-2.09 (m, 1H), 2.45-2.54 (m, 1H), 3.32-3.41 (m, 2H), 3.45-3.68 (m, 8H), 4.17 (dd, 1H, *J* = 10.5 and 8Hz), 4.97 (q, 1H, *J* = 7Hz), 7.33 (dd, 1H, *J* = 8 and 2Hz), 7.61 (s, 1H), 7.68 (d, 1H, *J* = 8Hz), 8.12 (s, 1H). LC-MS: *t*<sub>R</sub> 3.32mins; *m/z* (ES) 555/557 MH<sup>+</sup>, 553/555 (M-H)<sup>-</sup>.

**1t** (14.8mg, 69.5%) was prepared from *t*-butyl 6-chloro-2-[(3(*S*)-1-[(1*S*)-1-methyl-2-morpholin-4-yl-2-oxoethyl]-2-oxopyrrolidin-3-yl)amino)sulfonyl]-1*H*-indole-1-carboxylate (26mg, 0.047mmol) using procedure as described for **1s**. <sup>1</sup>H-NMR: δ(*d*<sup>4</sup>-MeOH) 1.27 (d, 3H, *J* = 7Hz), 1.75-1.87 (m, 1H), 2.29-2.39 (m, 1H), 3.28-3.33 (m, 2H), 3.44-3.68 (m, 8H), 4.24 (dd, 1H, *J* = 10 and 9Hz), 5.02 (q, 1H, *J* = 7Hz), 7.05 (s, 1H), 7.10 (dd, 1H, *J* = 8.6 and 1Hz), 7.46 (s, 1H), 7.61 (d, 1H, *J* = 8.6Hz). LC-MS: *t*<sub>R</sub> 2.84mins, 98% purity; *m/z* (ES) 455/457 MH<sup>+</sup>, 453/455 (M-H)<sup>-</sup>. HRMS: For C<sub>19</sub>H<sub>24</sub><sup>35</sup>ClN<sub>4</sub>O<sub>5</sub>S, *m/z* (MH<sup>+</sup>) calc. 455.1156; measured: 455.1160.

**6-(5-Chloro-2-thienyl)-*N*-{[(3*S*)-1-[(1*S*)-1-methyl-2-(4-morpholinyl)-2-oxoethyl]-2-oxo-3-pyrrolidinyl]-3-pyridinesulfonamide 1y**

6-(5-Chloro-2-thienyl)-3-pyridinesulfonyl chloride **6y** (crude, 473mg) as an orange gum was prepared from 5-bromo-2-(5-chloro-2-thienyl)pyridine<sup>18</sup> (403mg, 1.47mmol) using **Method B**, except that *t*-BuLi (1.7M in hexanes, 1.05 eq., 0.91mL, 1.54mmol) was used instead of *n*-BuLi, under General Procedures and used without further purification.

**1y** (71mg, 33%) as a white solid was synthesized from **2** (104.6mg, 0.434mmol) and 6-(5-chloro-2-thienyl)-3-pyridinesulfonyl chloride **6y** (crude, 153mmol) using **Method A** under General Procedures. <sup>1</sup>H-NMR: δ(CDCl<sub>3</sub>) 1.32 (d, 3H, *J* = 7Hz), 1.97-2.10 (m, 1H), 2.57-2.67 (m, 1H), 3.33 (td, 1H, *J* = 10 and 6Hz), 3.43-3.74 (m, 9H), 3.85 (bt, 1H, *J* = 8.1Hz), 5.00 (q, 1H, *J* = 7Hz), 5.54 (bs, 1H), 6.98 (d, 1H, *J* = 4Hz), 7.47 (d, 1H, *J* = 4Hz), 7.69 (d, 1H, *J* = 8.6Hz), 8.16 (dd, 1H, *J* = 8.6 and 2Hz), 8.98 (d, 1H, *J* = 2Hz). LC-MS: *t*<sub>R</sub> 2.95mins; *m/z* (ES) 499/501 MH<sup>+</sup>, 497/499 (M-H)<sup>-</sup>. Anal. (C<sub>20</sub>H<sub>23</sub>ClN<sub>4</sub>O<sub>5</sub>S<sub>2</sub>·0.5H<sub>2</sub>O): C, H, N.

## Electrostatic Potential Maps of selected chloro-(hetero)aryl N-methylsulfonamides

*Ab initio* calculations were carried out on *N*-methyl chloro(hetero)arylsulfonamides, as model systems of a series of arylsulfonamides 1, using Gaussian 94 with HF method, 6-31 G(d) basis set and full geometry optimisation in Cerius<sup>2</sup>. ESPD charges were computed and electrostatic potential (esp) energy range  $\pm 20$  kcal/mol were mapped onto electron density surfaces. Electrostatic potential maps of selected *N*-methyl chloro(hetero)arylsulfonamides are depicted below (Figure I) and show clearly a slight positive charge at the centre of the chlorine atoms (view B). Similar esp maps were observed with other chloro-(hetero)aryl *N*-methylsulfonamides.

### P1 group in 1c:

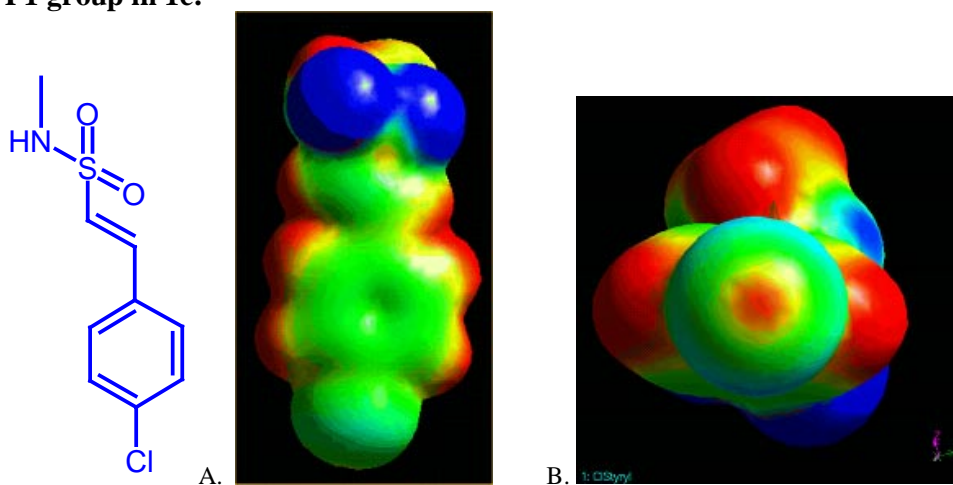

### P1 group in 1f:

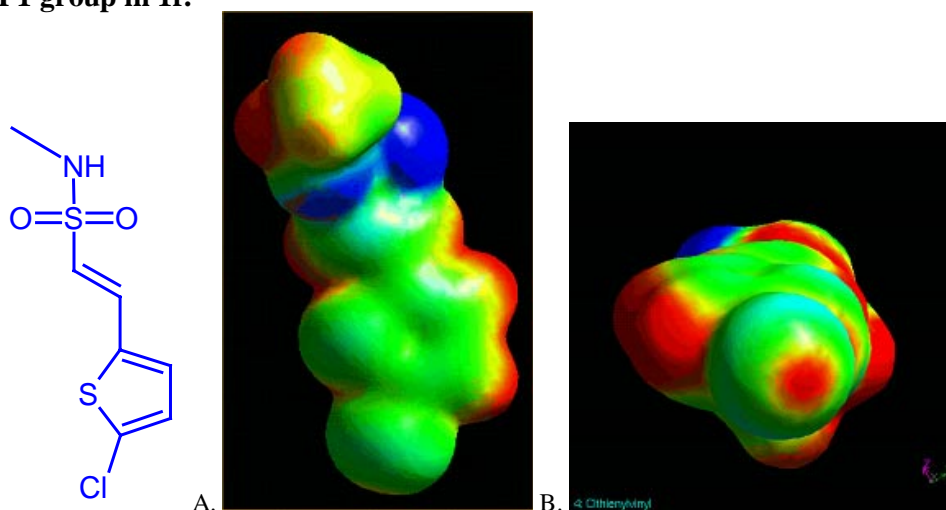

Figure I: Electrostatic Potential Maps of selected *N*-methyl sulfonamide P1 groups. A shows esp mapped onto electron densities of the truncated structure viewing from the face of aromatic rings. B shows the slight positive charge at the centre of the chlorine atom.
